# Supplementary material for: Prevalence of Biofilm Formation and Multidrug Resistance in Clinical Isolates of Staphylococcus Aureus
Source: Research Square preprint supplement (doi:10.21203/rs.3.rs-5756987/v1), 2025-04-07
Supplement: Supplementary file 1 [file 250c3c2ad6b3db1bf82ec7d8.docx]

| Lane L: 100bp ladder  Lane P: *Staphylococcus aureus* (NCTC 13812) (Positive control)  Lane N: Escherichia coli (ATCC 2592) (Negative control)  Lane 4-14: Confirmed *Staphylococcus aureus* isolates  1000bp  500bp  300bp  100bp | **L P N 1 2 3 4 5 6 7 8 9 10 11 12 13 14 L**    **Plate I: Electrophoretograph of the amplified 16S rRNA (257bp) gene in *S. aureus* isolates.** | **16S rRNA**  **Gene (257bp)** |
| --- | --- | --- |
