# Supplementary material for: Prevalence of Biofilm Formation and Multidrug Resistance in Clinical Isolates of Staphylococcus Aureus
Source: Research Square preprint supplement (doi:10.21203/rs.3.rs-5756987/v1), 2025-04-07
Supplement: Supplementary file 2 [file 61420918f8eba0758f079643.docx]

\\

**Supplementary Table 1: Biofilm formation and MDR characteristic of *S. aureus* Isolates**

| Isolates Number | Characteristics | |
| --- | --- | --- |
|  | **MDR** | **Biofilm formation**  **(MTP method)** |
|  |  |
| 8 | No | Yes |
| 17 | Yes | No |
| 27 | No | Yes |
| 28 | Yes | Yes |
| 29 | No | Yes |
| 42 | Yes | No |
| 45 | Yes | Yes |
| 60 | Yes | No |
| 63 | Yes | No |
| 67 | Yes | Yes |
| 69 | Yes | Yes |
| 73 | Yes | No |
| 81 | No | No |
| 91 | Yes | Yes |
| 97 | No | Yes |
| 101 | No | Yes |
| 102 | No | Yes |
| 106 | No | Yes |
| 112 | Yes | No |
| 147 | Yes | Yes |
| 187 | Yes | Yes |
| 195 | Yes | Yes |
| 199 | Yes | Yes |
| 201 | Yes | Yes |
| 207 | Yes | No |
| 210 | Yes | Yes |
| 221 | Yes | No |
| 226 | Yes | Yes |
| 237 | Yes | No |
| 243 | Yes | No |
| 245 | Yes | Yes |
| 272 | Yes | Yes |
| 273 | Yes | Yes |

Key: Yes= Positive, No= Negative
