# Supplementary material for: Prevalence of Biofilm Formation and Multidrug Resistance in Clinical Isolates of Staphylococcus Aureus
Source: Research Square preprint supplement (doi:10.21203/rs.3.rs-5756987/v1), 2025-04-07
Supplement: Supplementary file 3 [file 9e9f95af170e09f3b0f0c14a.docx]

**L 1 2 3 4 5 6 7 8 9 10 11**

| **Plate II: Electrophoretograph of the amplified *cna* and *ica*A genes in the *S. aureus* isolates.**  Lane L: 100bp ladder  Lane 1: *Escherichia* *coli* (*cna* Positive control)  Lane 2: isolate 35  Lane 3: (Negative control)  Lane 4: *Staphylococcus* *aureus* (*ica*A Positive control),  *ica*A gene (770bp)  *cna* gene (192bp)  1000bp  500bp  100bp |  |  |
| --- | --- | --- |
